# Supplementary material for: Conservation of human NMDA receptor subunits and disease variants in zebrafish
Source: Research Square preprint supplement (doi:10.21203/rs.3.rs-7151578/v1), 2025-07-30
Supplement: Supplementary file 1 [file 3ada87e108301cd5d027f600.docx]

SUPPLEMENTARY MATERIAL

**Conservation of human NMDA receptor subunits and disease variants in zebrafish**

**Nebet et al**

Supplementary Table 1. Pathogenic, putatively pathogenic, and complex variants by domain 2

Supplementary Table 2. Putatively benign and benign variants by domain 3

Supplementary Figure 1. Key structure-function motifs in the NMDAR transmembrane domain (TMD) and LBD-TMD linkers are conserved 4

Supplementary Figure 2. Agonist binding side chains in the NMDAR ligand-binding domain (LBD) are conserved 5

Supplementary Table 3. Homology modeling of the NTD 6

Supplementary Figure 3. Conservation of CTD protein-binding motif (PBM) regions 7

# Supplementary Table 1. Pathogenic, putatively pathogenic, and complex variants by domain

| **Designation** | **Domain** | **GluN1** | **GluN2A** | **GluN2B** | **GluN2D** |
| --- | --- | --- | --- | --- | --- |
| Pathogenic | NTD | 2 | 6 | 3 | 1 |
|  | S1 | 3 | 8 | 11 | 0 |
|  | S2 | 5 | 16 | 23 | 1 |
|  | S1-M1 | 5 | 3 | 6 | 1 |
|  | M3-S2 | 2 | 1 | 2 | 1 |
|  | S2-M4 | 3 | 4 | 7 | 1 |
|  | M1 | 1 | 2 | 2 | 0 |
|  | M1-M2 | 0 | 0 | 1 | 0 |
|  | M2 | 2 | 1 | 3 | 0 |
|  | M2-M3 | 4 | 3 | 4 | 0 |
|  | M3 | 14 | 11 | 8 | 6 |
|  | M4 | 7 | 1 | 9 | 0 |
|  | CTD | 1 | 2 | 2 | 1 |
|  |  |  |  |  |  |
| Putatively Pathogenic | NTD | 36 | 55 | 44 | 26 |
|  | S1 | 13 | 20 | 12 | 1 |
|  | S2 | 18 | 28 | 23 | 8 |
|  | S1-M1 | 5 | 3 | 4 | 1 |
|  | M3-S2 | 5 | 2 | 3 | 0 |
|  | S2-M4 | 6 | 2 | 3 | 0 |
|  | M1 | 2 | 2 | 5 | 3 |
|  | M1-M2 | 2 | 1 | 2 | 2 |
|  | M2 | 3 | 1 | 5 | 0 |
|  | M2-M3 | 2 | 3 | 1 | 0 |
|  | M3 | 16 | 8 | 6 | 5 |
|  | M4 | 5 | 4 | 4 | 2 |
|  | CTD | 10 | 85 | 73 | 61 |
|  |  |  |  |  |  |
| Complex | NTD | 1 | 0 | 1 | 1 |
|  | S1 | 0 | 0 | 0 | 0 |
|  | S2 | 0 | 4 | 1 | 0 |
|  | S1-M1 | 1 | 0 | 2 | 0 |
|  | M3-S2 | 0 | 0 | 0 | 0 |
|  | S2-M4 | 1 | 1 | 0 | 0 |
|  | M1 | 0 | 0 | 0 | 0 |
|  | M1-M2 | 0 | 0 | 0 | 0 |
|  | M2 | 0 | 0 | 0 | 0 |
|  | M2-M3 | 0 | 0 | 0 | 0 |
|  | M3 | 0 | 0 | 0 | 0 |
|  | M4 | 0 | 0 | 0 | 0 |
|  | CTD | 0 | 0 | 2 | 0 |

Number of identified variants per subunit per domain or subdomain.

# Supplementary Table 2. Putatively benign and benign variants by domain

| **Designation** | **Domain** | ***GluN1*** | ***GluN2A*** | ***GluN2B*** | ***GluN2D*** |
| --- | --- | --- | --- | --- | --- |
| Putatively Benign | NTD | 50 | 95 | 47 | 67 |
|  | S1 | 15 | 16 | 5 | 6 |
|  | S2 | 6 | 12 | 7 | 14 |
|  | S1-M1 | 0 | 2 | 0 | 0 |
|  | M3-S2 | 0 | 1 | 0 | 0 |
|  | S2-M4 | 0 | 1 | 0 | 1 |
|  | M1 | 0 | 2 | 2 | 2 |
|  | M1-M2 | 0 | 2 | 2 | 4 |
|  | M2 | 0 | 1 | 0 | 1 |
|  | M2-M3 | 0 | 0 | 0 | 0 |
|  | M3 | 0 | 0 | 0 | 0 |
|  | M4 | 2 | 1 | 5 | 2 |
|  | CTD | 7 | 187 | 131 | 126 |
|  |  |  |  |  |  |
| Benign | NTD | 228 | 258 | 186 | 288 |
|  | S1 | 44 | 32 | 22 | 59 |
|  | S2 | 41 | 46 | 24 | 66 |
|  | S1-M1 | 4 | 5 | 1 | 9 |
|  | M3-S2 | 4 | 2 | 1 | 5 |
|  | S2-M4 | 3 | 2 | 4 | 5 |
|  | M1 | 5 | 11 | 6 | 17 |
|  | M1-M2 | 8 | 8 | 9 | 16 |
|  | M2 | 0 | 4 | 1 | 5 |
|  | M2-M3 | 0 | 3 | 2 | 6 |
|  | M3 | 3 | 4 | 4 | 9 |
|  | M4 | 5 | 10 | 7 | 13 |
|  | CTD | 51 | 423 | 401 | 363 |

Number of identified variants per subunit per domain or subdomain.


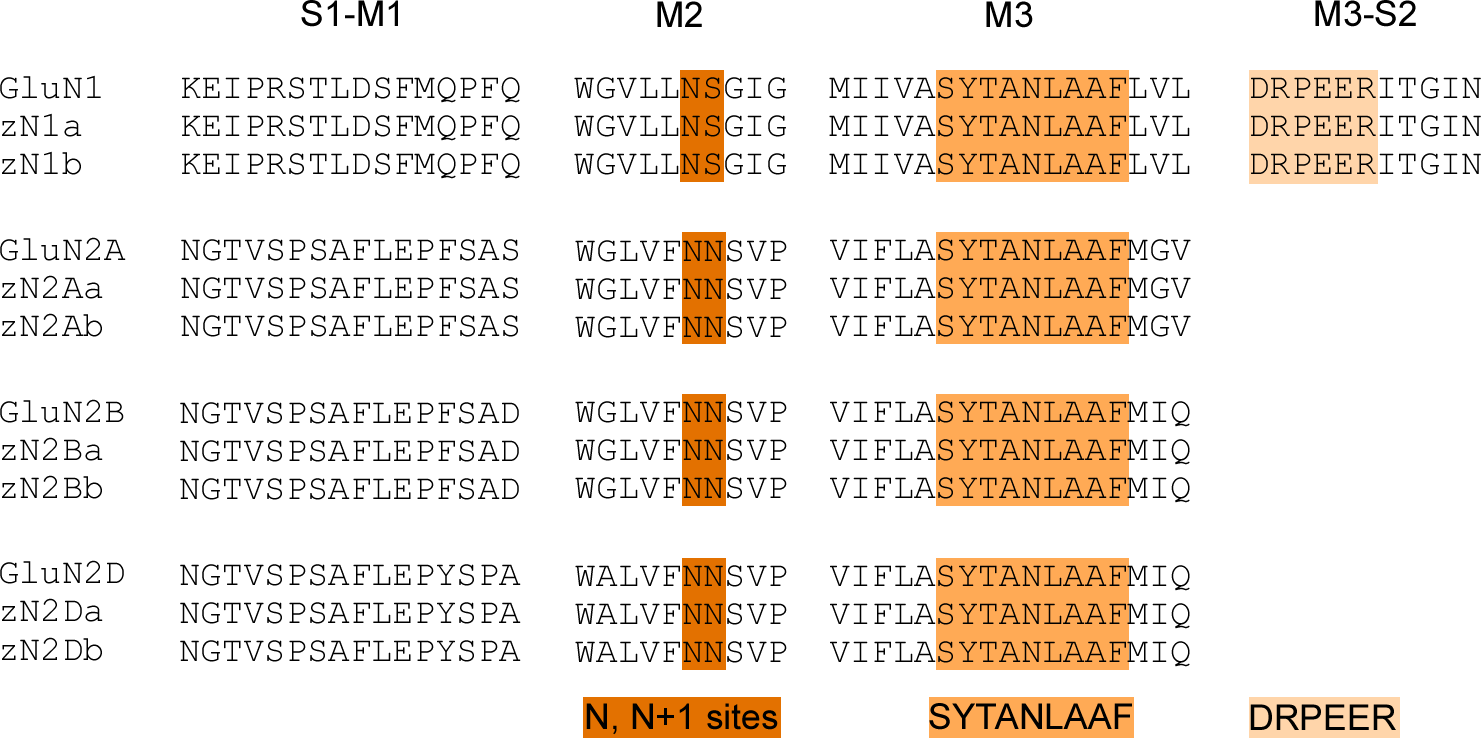


# Supplementary Figure 1. Key motifs in the NMDAR transmembrane domain (TMD) and LBD-TMD linkers are conserved

Conservation of TMD and LBD-TMD linker regions that participate in channel gating, Mg2+ block, and Ca2+ flux ([1](#_ENREF_1)): The S1-M1 linker which contains a ‘pre-M1’ helix is a key component of efficient ion channel gating ([2](#_ENREF_2)); the N and N+1 sites (dark orange) in the M2 pore loop contribute to channel block by Mg2+ and Ca2+ permeability ([1](#_ENREF_1), [3](#_ENREF_3)); the ‘SYTANLAAF’ motif (orange) in the M3 transmembrane segment is essential for channel gating and forms the external gate; and in GluN1, the ‘DRPEER’ motif (light orange) facilitates high Ca2+ permeation ([4](#_ENREF_4)).


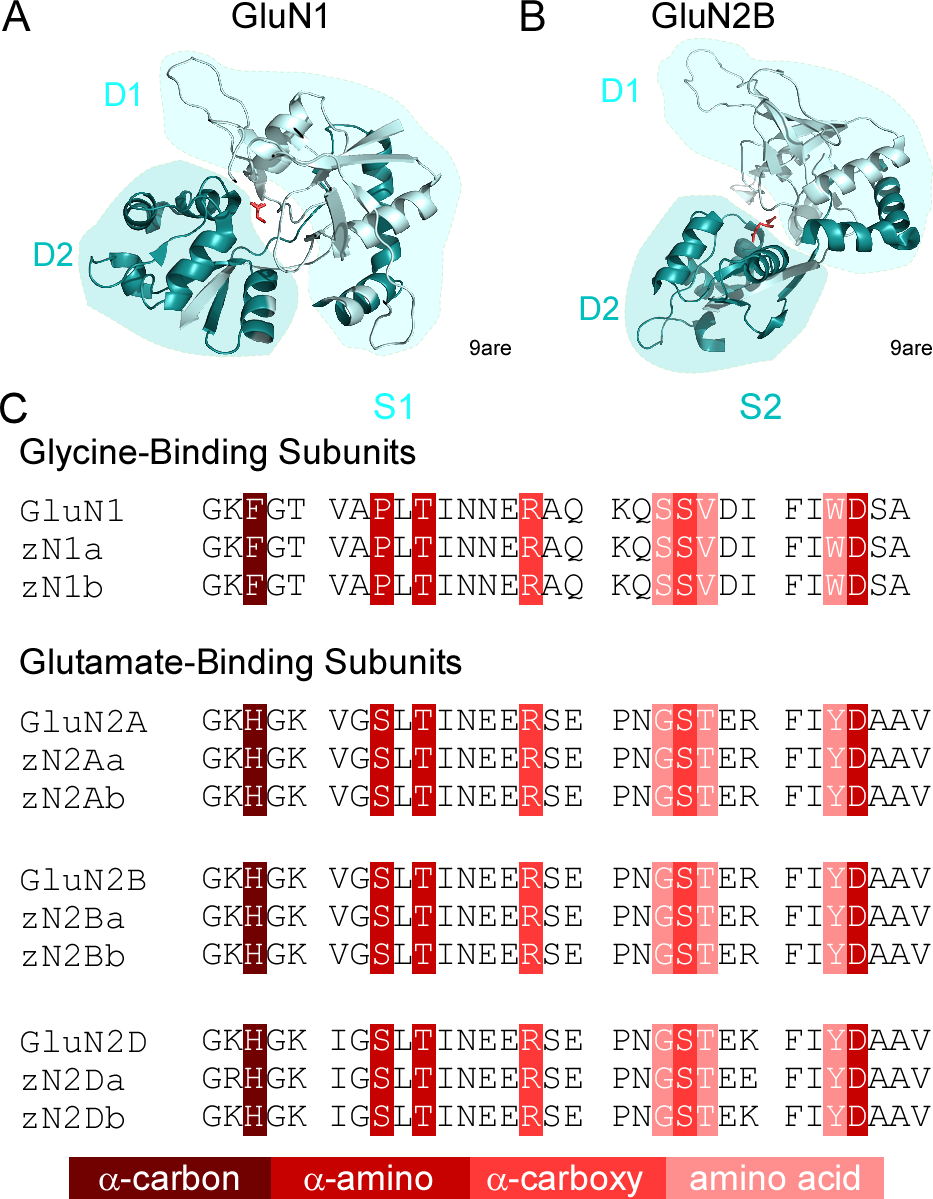


# Supplementary Figure 2. Agonist binding side chains in the NMDAR ligand-binding domain (LBD) are conserved

**(A-B)** Topology of GluN1 LBD binding glycine (red) **(A)** and GluN2A LBD binding glutamate (red) **(B)**. The LBD consists of D1, which primarily consists of S1, and D2, which is primarily S2. These two domains come together to form a clamshell-like structure that binds endogenous ligands. LBDs oriented to display agonist. 9are ([5](#_ENREF_5)).

**(C)** Conservation of LBD (S1 & S2) regions that participate in ligand binding along with conservation of specific residues that interact with distinct regions of the agonists.

Across GluN1 and the GluN2 subunits ([6](#_ENREF_6), [7](#_ENREF_7)), one amino acid in S1 participates in Van-der-Waals interactions with the α-carbon of the ligand (Fig. S2C, darkest red), three amino acids, two in S1 and one in S2, contribute to interactions with the α-amino group of the ligand (Fig. S2C, dark red), and one amino acid in S2 is involved in electrostatic interactions with the α-carboxyl group of the ligand (Fig. S2C, red). These critical residues are completely conserved (Fig. S2C). Lastly, three amino acids in S2 contribute to interactions with the ligand amino acid side chain. For the obligatory GluN1 subunit, GluN1-Ser687, GluN1-Val689, and GluN1-Trp731 allow for binding of glycine or D-serine (Fig. S2C, red). In the GluN2 subunits, with respect to GluN2A, the amino acids interacting with the ligand side chain of glutamate are GluN2A-Gly688 and GluN2A-Thr690 ([6](#_ENREF_6)) (Fig. S2). The GluN2A-Tyr730 position coordinates with GluN2A-Val708 and GluN2A-Tyr761 (not shown) for aspartate binding ([6](#_ENREF_6)).

# Supplementary Table 3. Homology modeling of the NTD

| **Subunit** | **Reference Structure** | **Comparison** | **RMSD** |
| --- | --- | --- | --- |
| GluN1 | 5tp0 | GluN1 vs zGluN1a | 0.071 |
|  |  | GluN1 vs zGluN1b | 0.094 |
|  |  |  |  |
| GluN1 | 5tpz | GluN1 vs zGluN1a | 0.085 |
|  |  | GluN1 vs zGluN1b | 0.097 |
|  |  |  |  |
| GluN2A | 5tp0 | GluN2A vs zGluN2Aa | 0.085 |
|  |  | GluN2A vs zGluN2Ab | 0.095 |
|  |  |  |  |
| GluN2A | 5tpw | GluN2A vs zGluN2Aa | 2.149 |
|  |  | GluN2A vs zGluN2Ab | 0.111 |
|  |  |  |  |
| GluN2B | 5tpz | GluN2B vs zGluN2Ba | 0.028 |
|  |  | GluN2B vs zGluN2Bb | 0.044 |
|  |  |  |  |
| Control | 5tpz | GluN1 vs GluN2B | 3.621 |

Generated homology models and calculated RMSD across NTDs.

As a reference for model alignments, we also aligned the human GluN1 and GluN2B proteins, which

resulted in an RMSD of 3.621, reflecting a much greater degree of difference across the structures than when we compare the human subunit to its zebrafish paralogs.


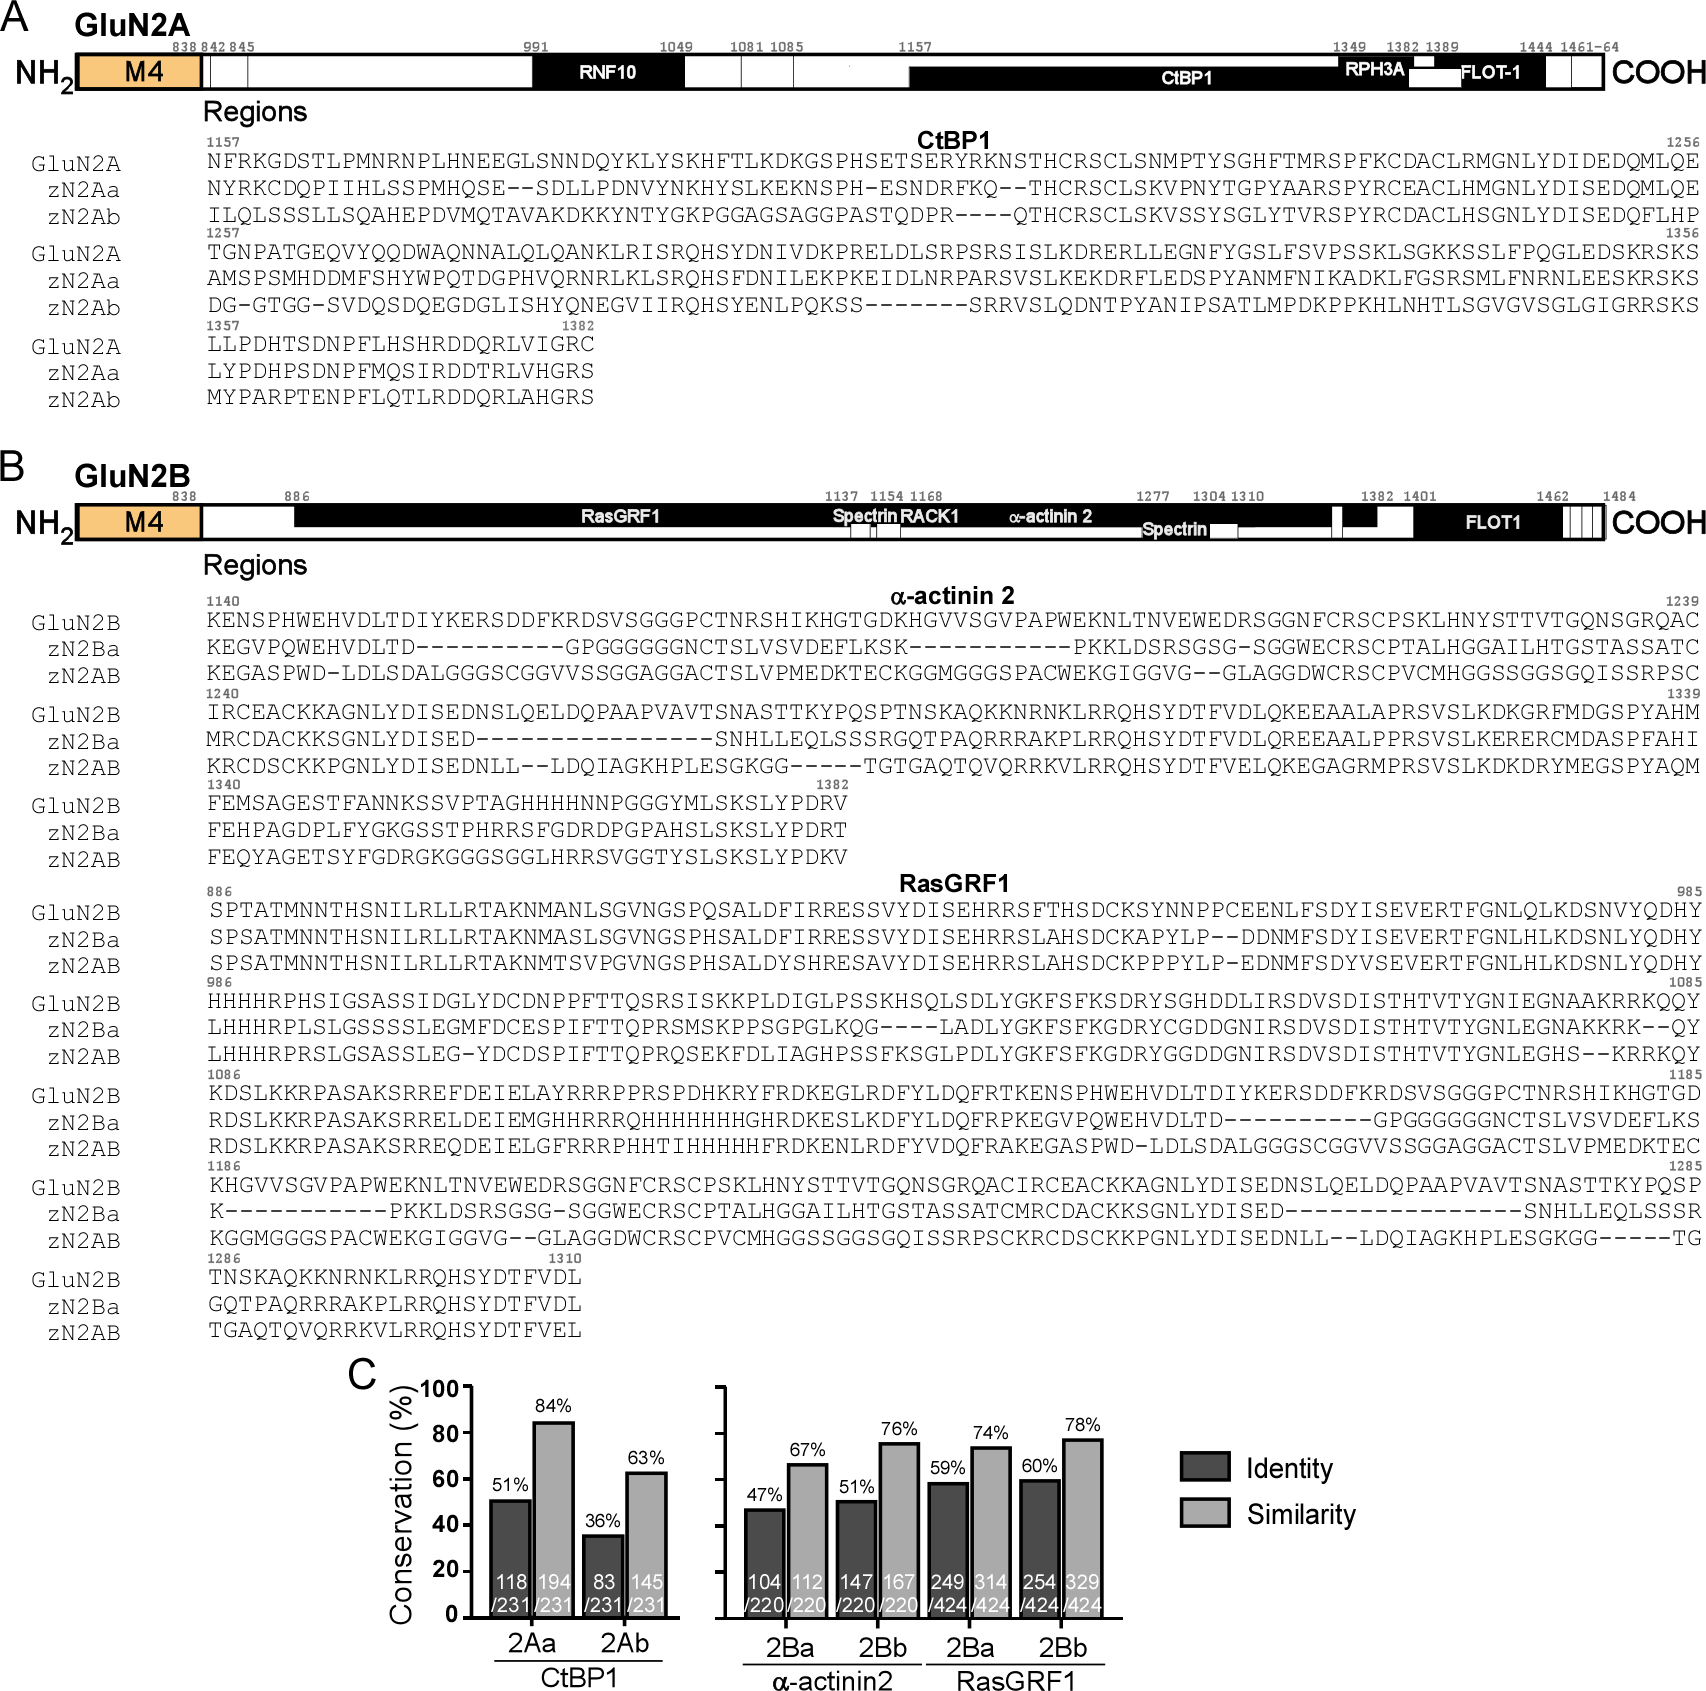


# Supplementary Figure 3. Conservation of CTD protein-binding motif (PBM) regions

**(A-B)** Schematics of CTD PBM ‘regions’ depicting the sequence for CtBP1 binding in GluN2A **(A)** and α-actinin 2 binding in GluN2B **(B)**.

**(C)** Percent conservation of CTD PBMs ‘region’ depicted in **(A-B)**. Conservation is reported in identity (dark gray) and similarity (light gray).

**REFERENCES**

1. Hansen KB, Wollmuth LP, Bowie D, Furukawa H, Menniti FS, Sobolevsky AI, et al. Structure, Function, and Pharmacology of Glutamate Receptor Ion Channels. Pharmacol Rev. 2021;73(4):298-487.

2. McDaniel MJ, Ogden KK, Kell SA, Burger PB, Liotta DC, Traynelis SF. NMDA receptor channel gating control by the pre-M1 helix. J Gen Physiol. 2020;152(4).

3. Wollmuth LP. Ion permeation in ionotropic glutamate receptors: Still dynamic after all these years. Curr Opin Physiol. 2018;2:36-41.

4. Watanabe J, Beck C, Kuner T, Premkumar LS, Wollmuth LP. DRPEER: a motif in the extracellular vestibule conferring high Ca2+ flux rates in NMDA receptor channels. J Neurosci. 2002;22(23):10209-16.

5. Chou TH, Epstein M, Fritzemeier RG, Akins NS, Paladugu S, Ullman EZ, et al. Molecular mechanism of ligand gating and opening of NMDA receptor. Nature. 2024;632(8023):209-17.

6. Ramos-Vicente D, Grant SG, Bayes A. Metazoan evolution and diversity of glutamate receptors and their auxiliary subunits. Neuropharmacology. 2021;195:108640.

7. Furukawa H, Singh SK, Mancusso R, Gouaux E. Subunit arrangement and function in NMDA receptors. Nature. 2005;438(7065):185-92.
